# Supplementary material for: Transcription elongation rate has a tissue-specific impact on alternative cleavage and polyadenylation in Drosophila melanogaster
Source: PubMed Central journal article supplement — RNA. 2017 Dec;23(12):1807–16. doi: 10.1261/rna.062661.117 (PMC5689002; doi:10.1261/rna.062661.117), 2017-12
Supplement: supp_062661.117_Supplemental_Figure_S1.pdf [file supp_062661.117_Supplemental_Figure_S1.pdf]

**Figure S1**

**A**

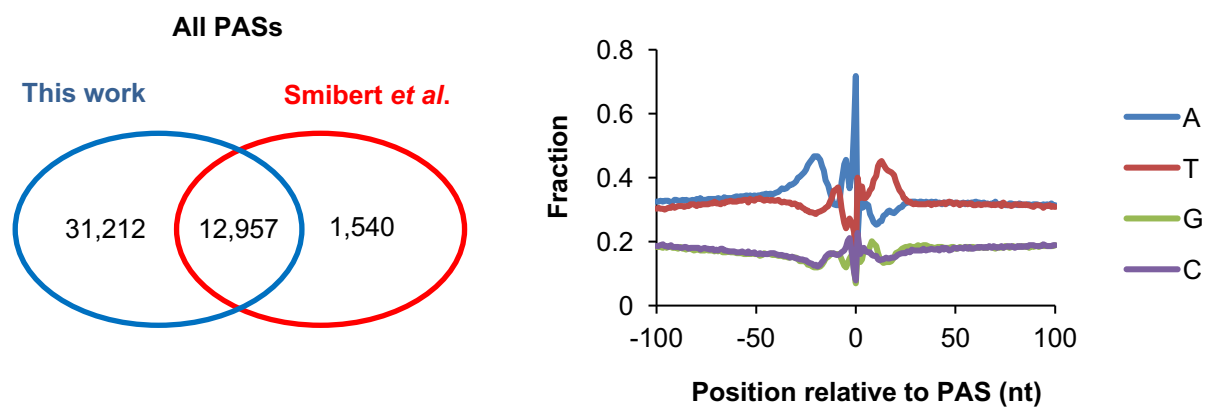

**B**

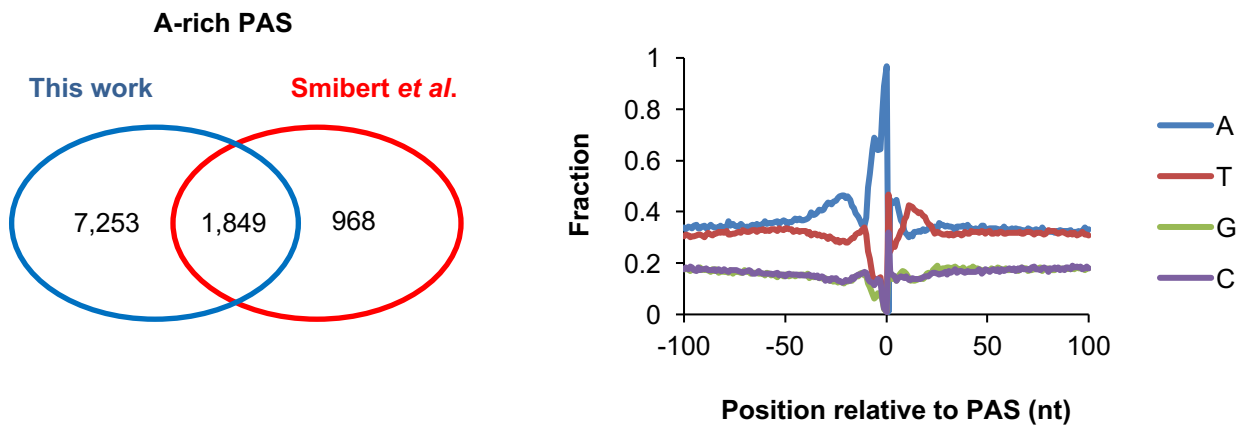

**Figure S1. Comparison of PASs identified in this study with those in Smibert *et al.*** **(A)** Left, Venn diagram comparing all PASs of mRNA genes from the two studies. Right, distributions of four nucleotides around the PAS. All PASs of mRNA genes were used. **(B)** Left, Venn diagram comparing A-rich PASs of mRNA genes from the two studies. An A-rich PAS was defined as a PAS located in a sequence with  $\geq 6$  consecutive As or  $\geq 7$  As in a 10-nt window in the -10- to +10-nt region around the PAS. Right, distributions of four nucleotides around the PAS. Only A-rich PASs of mRNA genes were used.
