# Supplementary material for: Transcription elongation rate has a tissue-specific impact on alternative cleavage and polyadenylation in Drosophila melanogaster
Source: PubMed Central journal article supplement — RNA. 2017 Dec;23(12):1807–16. doi: 10.1261/rna.062661.117 (PMC5689002; doi:10.1261/rna.062661.117), 2017-12
Supplement: supp_062661.117_Supplemental_Figure_S2.pdf [file supp_062661.117_Supplemental_Figure_S2.pdf]

# Figure S2

**A**

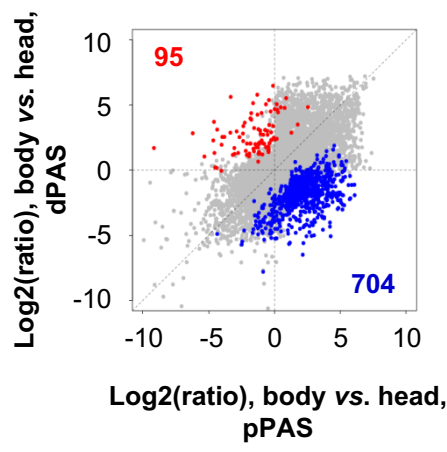

**B**

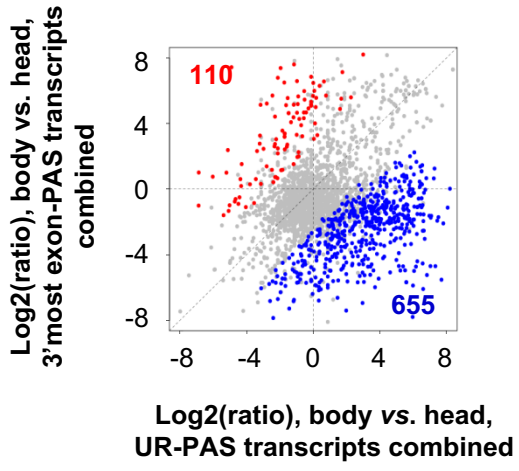

**Figure S2. APA difference between body and head in the *Rpl1215* mutant.** See Figures 3 and 4 for details about the plots.
