# Supplementary material for: Transcription elongation rate has a tissue-specific impact on alternative cleavage and polyadenylation in Drosophila melanogaster
Source: PubMed Central journal article supplement — RNA. 2017 Dec;23(12):1807–16. doi: 10.1261/rna.062661.117 (PMC5689002; doi:10.1261/rna.062661.117), 2017-12
Supplement: supp_062661.117_Supplemental_Figure_S4.pdf [file supp_062661.117_Supplemental_Figure_S4.pdf]

# Figure S4

**A**

## Top enriched 6-mers in four regions relative to PAS (nt)

|                                      | -100 to -41 | -40 to -1 | +1 to +40 | +41 to +100 |        |     |        |     |
|--------------------------------------|-------------|-----------|-----------|-------------|--------|-----|--------|-----|
| <b>PASs more used in mutant body</b> | CGCCCG      | 4.2       | TTTCCA    | 6.4         | GTTACC | 4.2 | GTGTGT | 5.7 |
|                                      | GATCAC      | 3.9       | CTTTCC    | 5.3         | CTCTCT | 3.8 | TGTGTA | 3.7 |
|                                      | CAGCAG      | 3.9       | TTTTCC    | 5.2         | AGCTGG | 3.2 | CTGCTG | 3.4 |
|                                      | CACCAG      | 3.9       | TGGCAC    | 5.1         | CCCTTC | 2.7 | CACGCA | 3.3 |
|                                      | GCGGCT      | 3.6       | AAAAAA    | 5.0         | CTGGTC | 2.7 | ACCTGC | 3.1 |
| <b>PASs less used in mutant body</b> | AAAAAA      | 5.9       | AATAAA    | 32.6        | ATATCT | 3.9 | TTTGAA | 4.2 |
|                                      | AAACAA      | 5.7       | ATAAAA    | 23.6        | TTTTTA | 3.7 | GGTAAG | 3.9 |
|                                      | TAAATG      | 5.5       | TAATAA    | 22.8        | TTATTA | 3.4 | GGGAAT | 3.4 |
|                                      | AATTTA      | 4.6       | AAATAA    | 22.1        | TCATGG | 3.2 | TTTTCC | 3.3 |
|                                      | AAAACA      | 4.2       | TAAATA    | 21.2        | AATTCA | 3.1 | TATTTG | 3.3 |

**B**

## Top enriched 6-mers in four regions relative to PAS (nt)

|                                      | -100 to -41 | -40 to -1 | +1 to +40 | +41 to +100 |        |     |        |     |
|--------------------------------------|-------------|-----------|-----------|-------------|--------|-----|--------|-----|
| <b>PASs more used in mutant head</b> | AAAAAA      | 51.5      | AAAAAA    | 25.2        | TTTTTT | 4.9 | AGGTGT | 2.8 |
|                                      | AAAAAT      | 12.0      | AAACAA    | 4.7         | GCTTTC | 4.7 | GCGCCT | 2.6 |
|                                      | TAAAAA      | 10.3      | AAATAA    | 4.7         | GGTCTG | 3.2 | GCACTA | 2.4 |
|                                      | ATAAAA      | 7.3       | AATAAA    | 4.6         | TGAGAG | 3.2 | TTCATA | 2.4 |
|                                      | AAAAAC      | 7.3       | AACAAA    | 4.2         | AAAAAA | 3.2 | TCGCGC | 2.3 |
| <b>PASs less used in mutant head</b> | TTTTTT      | 15.6      | ATATAT    | 8.8         | CCCCC  | 6.3 | ACACAC | 5.8 |
|                                      | GTTTTT      | 4.1       | TATATA    | 7.2         | TATATA | 5.5 | AAAAAA | 4.1 |
|                                      | TATGAT      | 4.1       | ATTTTT    | 4.5         | CAAACG | 3.3 | CACACA | 3.9 |
|                                      | TTGTAT      | 3.8       | TATATT    | 3.5         | ATATAT | 3.2 | TACGAC | 3.2 |
|                                      | GCCACC      | 3.6       | TTTGTT    | 3.3         | CGACTC | 3.1 | ACCCAT | 3.0 |

**Figure S4. Top enriched 6-mers around the PASs more used or less used in *RpII215* mutant flies. (A) Body samples. (B) Head samples. See Figure 3F for details.**
